# Supplementary material for: Adaptive Communication: Languages with More Non-Native Speakers Tend to Have Fewer Word Forms
Source: PubMed Central journal article supplement (PMC4470635; doi:10.1371/journal.pone.0128254), 2015-06-17
Supplement: pone.0128254.s002.pdf [file pone.0128254.s002.pdf]

## S2 File

### Maximum likelihood (ML) estimation

We used the *likelihood* package (Murphy, 2013) in R (R Core Team, 2013) implementing a simulated annealing procedure to estimate the parameters for best fitting curves. The pre-defined scientific model is the discrete and finite version of the ZM distribution in Equation (i):

$$P(X = r) = \frac{C}{(\beta + r)^\alpha} \quad C > 0, \alpha > 0, \beta > -1, r = 1, \dots, k. \quad (\text{i})$$

In this equation  $r$  is the rank of a word type in a frequency distribution,  $k$  is the number of different word types,  $\alpha$  and  $\beta$  are parameters and  $C$  is a normalizing constant defined as:

$$C = \left( \sum_{r=1}^k (\beta + r)^{-\alpha} \right)^{-1}.$$

Parameters  $\alpha$  and  $\beta$  are to be estimated.

Following Izsák (2006) we assume that the frequencies  $f$  of words in a random sample  $X = (f_1, f_2, \dots, f_k)$  of size  $n$  will be multinomially distributed, which renders the likelihood function in Equation (ii):

$$L(\theta | X) = \frac{n!}{f_1! f_2! \dots f_k!} \prod_{i=1}^k p_{\theta,i}^{f_i}. \quad (\text{ii})$$

Plugging Equation (i) into Equation (ii) then renders the likelihood function to be maximized:

$$L(\theta | X) = P(f_1, f_2, \dots, f_k, \alpha, \beta) = \frac{n!}{f_1! f_2! \dots f_k!} \prod_{i=1}^k \left( \frac{C}{(\beta + r)^\alpha} \right)^{f_i}. \quad (\text{iii})$$

To find the optimal parameters for (iii) the *likelihood* package uses an annealing algorithm (see Murphy, 2013) that systematically searches the parameter space rather than numerically solving the maximization problem. We restricted the cycles of the annealing function to a maximum of 10000. Also, we followed Izsák (2006: 112-113) in giving initial parameters approximated by means of a linear regression model.

### References

- Izsák, J. (2006). Some practical aspects of fitting and testing the Zipf-Mandelbrot model: A short essay. *Scientometrics*, 67(1), 107–120. doi:10.1556/Scient.67.2006.1.7
- Murphy, L. (2013). R package “likelihood”: Methods for maximum likelihood estimation. Retrieved from [cran.r-project.org/web/packages/likelihood/index.html](http://cran.r-project.org/web/packages/likelihood/index.html)
- R Core Team. (2013). R: A language and environment for statistical computing. Vienna, Austria: R Foundation for Statistical Computing. doi:ISBN 3-900051-07-0
